# Supplementary material for: Novel p-type thermoelectric materials Cu3MCh4 (M = V, Nb, Ta; Ch = Se, Te): high band-degeneracy
Source: Royal Society of Chemistry journal article supplement (doi:10.1039/c7ta02178j), 2017-01-01
Supplement: c7ta02178j1.pdf [file c7ta02178j1.pdf]

## SUPPLEMENTARY MATERIALS

### **Novel *p*-type thermoelectric materials $\text{Cu}_3\text{MCh}_4$ ( $\text{M} = \text{V}, \text{Nb}, \text{Ta}$ ; $\text{Ch} = \text{Se}, \text{Te}$ ): High band degeneracy**

A. J. Hong<sup>a</sup>, C. L. Yuan<sup>\*a</sup>, G. Gu<sup>a</sup>, and J. -M. Liu<sup>\*b,c</sup>

*\*Correspondence and requests for materials should be addressed to J.M.L. (email: [liujm@nju.edu.cn](mailto:liujm@nju.edu.cn)) or C.L.Y. (email: [clyuan@jxnu.edu.cn](mailto:clyuan@jxnu.edu.cn))*

<sup>a</sup> *Jiangxi Key Laboratory of Nanomaterials and Sensors, School of Physics, Communication and Electronic, Jiangxi Normal University, Nanchang 330022, China.*

<sup>b</sup> *Laboratory of Solid State Microstructures and Innovation Center of Advanced Microstructures, Nanjing University, Nanjing 210093, China.*

<sup>c</sup> *Institute for Advanced Materials and Laboratory of Quantum Engineering and Quantum Materials, South China Normal University, Guangzhou 510006, China.*

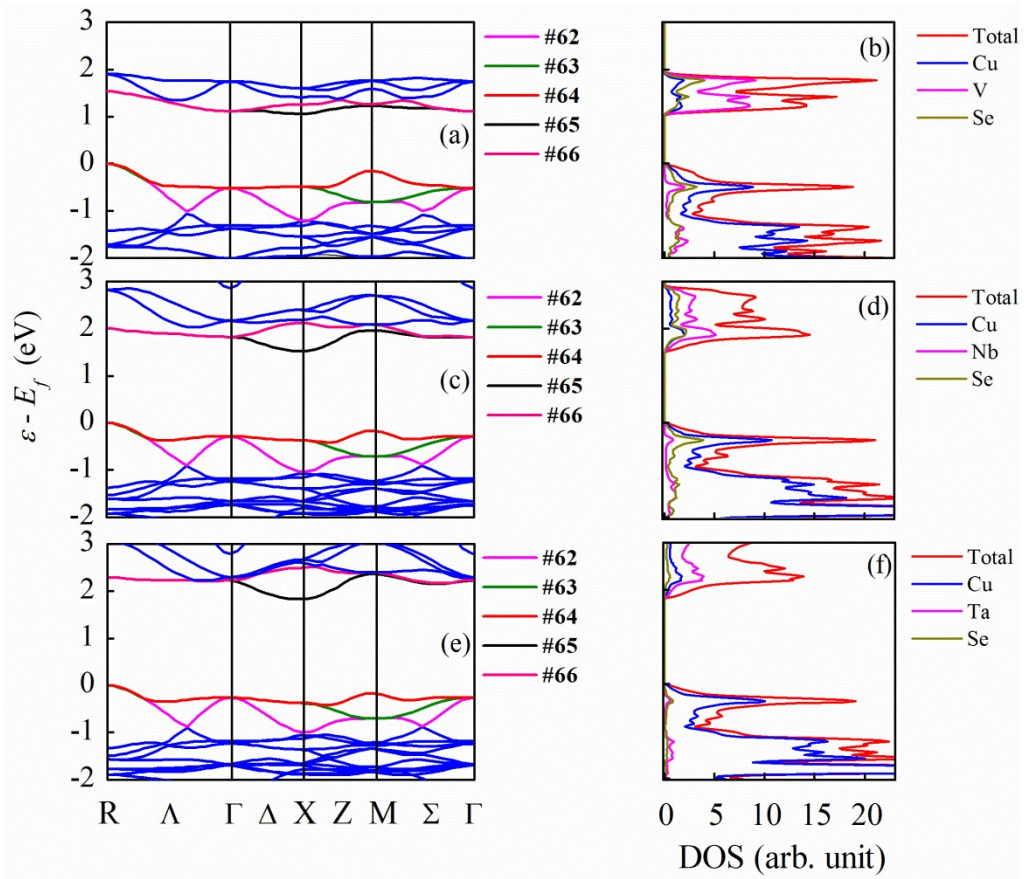

**Figure S1.** The calculated band structure of  $\text{Cu}_3\text{VSe}_4$  (a),  $\text{Cu}_3\text{NbSe}_4$  (c), and  $\text{Cu}_3\text{TaSe}_4$  (e), as well as the calculated total and partial DOS data of  $\text{Cu}_3\text{VSe}_4$  (b),  $\text{Cu}_3\text{NbSe}_4$  (d), and  $\text{Cu}_3\text{TaSe}_4$  (f), respectively.

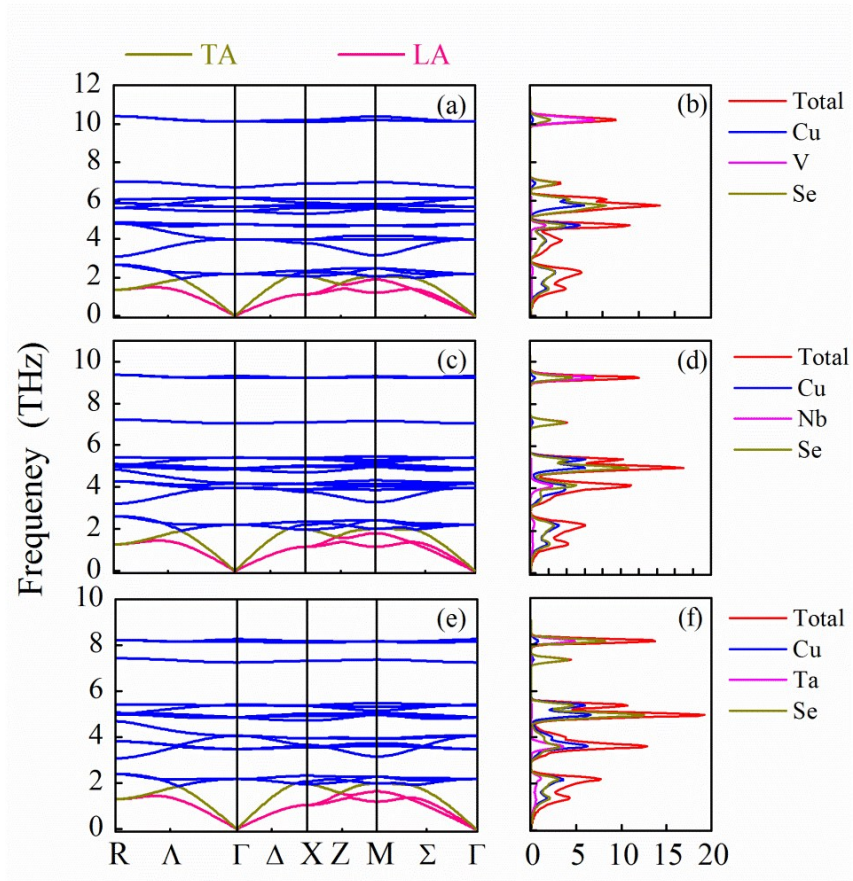

**Figure S2.** The calculated phonon spectra of  $\text{Cu}_3\text{VSe}_4$  (a),  $\text{Cu}_3\text{NbSe}_4$  (c), and  $\text{Cu}_3\text{TaSe}_4$  (e), as well as the calculated total and partial phonon DOS data of  $\text{Cu}_3\text{VSe}_4$  (b),  $\text{Cu}_3\text{NbSe}_4$  (d), and  $\text{Cu}_3\text{TaSe}_4$  (f).

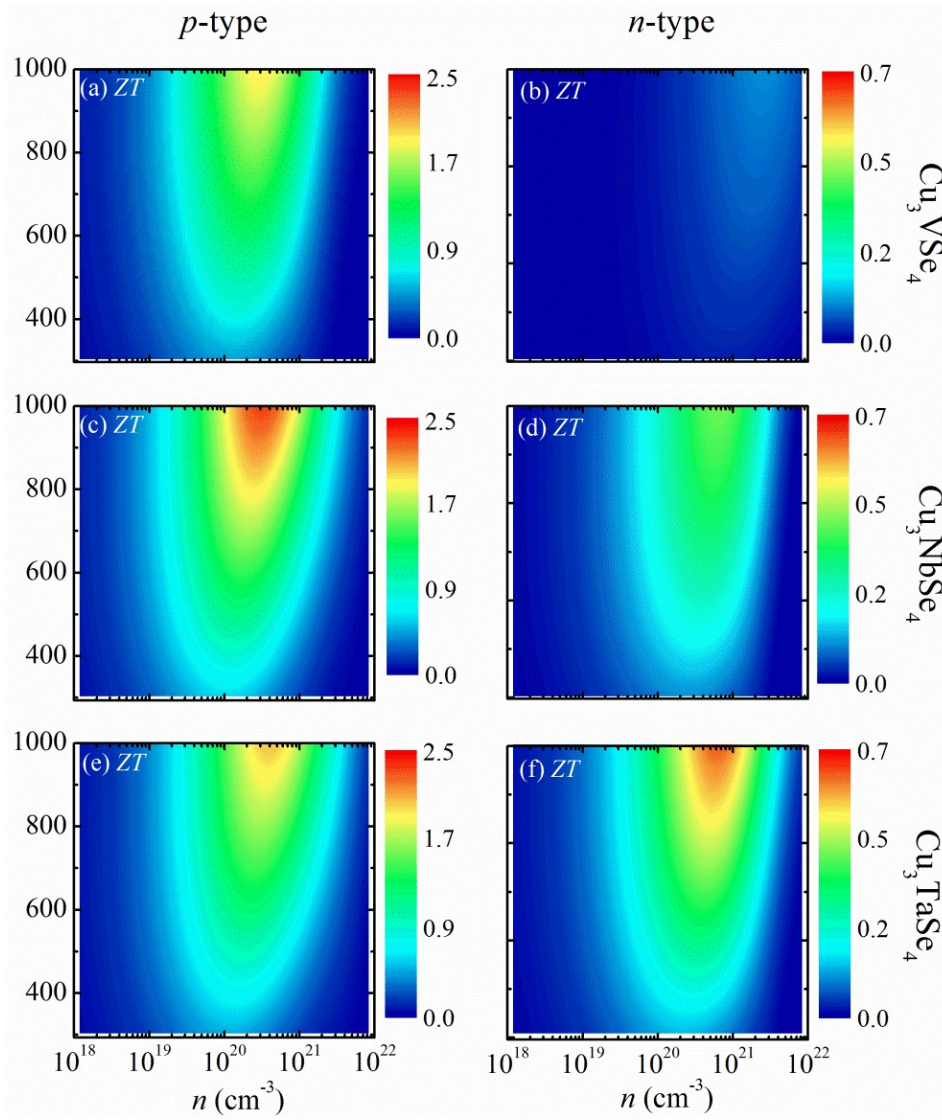

**Figure S3.** The temperature  $T$  and carrier density  $n$  dependences of the  $ZT$  values of the  $p$ -type  $\text{Cu}_3\text{VSe}_4$  (a),  $\text{Cu}_3\text{NbSe}_4$  (c), and  $\text{Cu}_3\text{TaSe}_4$  (e), as well as the  $n$ -type  $\text{Cu}_3\text{VSe}_4$  (b),  $\text{Cu}_3\text{NbSe}_4$  (d),  $\text{Cu}_3\text{NbSe}_4$  (f).
